# Supplementary material for: The intelligent knife (iKnife) and its intraoperative diagnostic advantage for the treatment of cervical disease
Source: PubMed Central journal article supplement — Proc Natl Acad Sci U S A. 2020 Mar 16;117(13):7338–46. doi: 10.1073/pnas.1916960117 (PMC7132269; doi:10.1073/pnas.1916960117), 2020-03-16
Supplement: pnas.1916960117.sapp.pdf [file pnas.1916960117.sapp.pdf]

**Table S1.** Multiple ratters' impressions of tissue type (Surgeon vs Histopathologist vs iKnife).

| Burn | SAMPLE INFORMATION | SURGEON'S IMPRESSION | HISTOPATHOLOGISTS IMPRESSION      |       |                    | IKNIFE IMPRESSION |                 |
|------|--------------------|----------------------|-----------------------------------|-------|--------------------|-------------------|-----------------|
|      | Patient -Burn      | Class                | Histological diagnosis (comments) | Class | Tumour content (%) | Class             | Probability (%) |
| 01   | 1-1                | Ca                   | N                                 | N     | N/A                | HPV±CIN           | 95.97           |
| 02   | 1-2                | Ca                   | N                                 | N     | N/A                | HPV±CIN           | 87.18           |
| 03   | 2-1                | N                    | N                                 | N     | N/A                | Normal            | 80.28           |
| 04   | 2-2                | N                    | N                                 | N     | N/A                | Normal            | 91.34           |
| 05   | 3-1                | Ca                   | SCC (CIN2-3 in sample)            | Ca    | 60                 | Cancer            | 99.21           |
| 06   | 3-2                | Ca                   | SCC (CIN2-3 in sample)            | Ca    | 60                 | Cancer            | 91.05           |
| 07   | 3-3                | Ca                   | SCC (CIN2-3 in sample)            | Ca    | 60                 | Cancer            | 93.42           |
| 08   | 4-1                | Ca                   | N (Dense fibrotic stroma)         | N     | N/A                | Normal            | 90.47           |
| 09   | 4-2                | Ca                   | N (Dense fibrotic stroma)         | N     | N/A                | Normal            | 95.83           |
| 10   | 5-1                | Ca                   | SCC                               | Ca    | 95                 | Cancer            | 98.58           |
| 11   | 5-2                | Ca                   | SCC                               | Ca    | 95                 | Cancer            | 99.16           |
| 12   | 5-3                | Ca                   | SCC                               | Ca    | 95                 | Cancer            | 98.22           |
| 13   | 6-1                | Ca                   | SCC                               | Ca    | 80                 | Cancer            | 98.08           |
| 14   | 6-2                | Ca                   | SCC                               | Ca    | 80                 | Normal            | 94.79           |
| 15   | 6-3                | Ca                   | SCC                               | Ca    | 80                 | Cancer            | 90.01           |
| 16   | 6-4                | Ca                   | SCC                               | Ca    | 80                 | Cancer            | 86.75           |
| 17   | 7-1                | Ca                   | SCC (CIN3 in 40% of sample)       | Ca    | 50                 | Normal            | 92.56           |
| 18   | 7-2                | Ca                   | SCC (CIN3 in 40% of sample)       | Ca    | 50                 | Cancer            | 99.19           |
| 19   | 8-1                | Ca                   | SCC                               | Ca    | 90                 | Normal            | 62.91           |
| 20   | 9-1                | Ca                   | SCC                               | Ca    | 95                 | Normal            | 95.60           |
| 21   | 9-2                | Ca                   | SCC                               | Ca    | 95                 | Cancer            | 99.31           |
| 22   | 9-3                | Ca                   | SCC                               | Ca    | 95                 | Normal            | 87.65           |
| 23   | 10-1               | CIN3                 | CIN2/3                            | CIN   | N/A                | HPV±CIN           | 99.30           |
| 24   | 10-2               | CIN3                 | CIN2/3                            | CIN   | N/A                | HPV±CIN           | 99.35           |
| 25   | 10-3               | CIN3                 | CIN2/3                            | CIN   | N/A                | HPV±CIN           | 99.36           |
| 26   | 11-1               | CIN3                 | HPV                               | CIN   | N/A                | HPV±CIN           | 99.38           |
| 27   | 11-2               | CIN3                 | HPV                               | CIN   | N/A                | HPV±CIN           | 99.37           |
| 28   | 11-3               | CIN3                 | HPV                               | CIN   | N/A                | HPV±CIN           | 99.37           |
| 29   | 12-1               | CIN1                 | N                                 | N     | N/A                | Normal            | 79.20           |
| 30   | 12-2               | CIN1                 | N                                 | N     | N/A                | Normal            | 91.48           |
| 31   | 13-1               | N                    | N                                 | N     | N/A                | Normal            | 89.80           |
| 32   | 14-1               | CIN1-2               | N                                 | N     | N/A                | Normal            | 86.27           |
| 33   | 15-1               | CIN3                 | CIN2                              | CIN   | N/A                | HPV±CIN           | 99.37           |
| 34   | 15-2               | CIN3                 | CIN2                              | CIN   | N/A                | HPV±CIN           | 99.37           |
| 35   | 16-1               | CIN2                 | CIN3                              | CIN   | N/A                | HPV±CIN           | 99.36           |
| 36   | 16-2               | CIN2                 | CIN3                              | CIN   | N/A                | HPV±CIN           | 99.37           |
| 37   | 17-1               | CIN2                 | CIN1                              | CIN   | N/A                | HPV±CIN           | 99.36           |
| 38   | 17-2               | CIN2                 | CIN1                              | CIN   | N/A                | HPV±CIN           | 99.37           |
| 39   | 17-3               | CIN2                 | CIN1                              | CIN   | N/A                | HPV±CIN           | 98.57           |
| 40   | 18-1               | CIN2                 | CIN2                              | CIN   | N/A                | HPV±CIN           | 99.34           |
| 41   | 18-2               | CIN2                 | CIN2                              | CIN   | N/A                | HPV±CIN           | 99.35           |
| 42   | 18-3               | CIN2                 | CIN2                              | CIN   | N/A                | HPV±CIN           | 99.32           |
| 43   | 18-4               | CIN2                 | CIN2                              | CIN   | N/A                | HPV±CIN           | 99.36           |
| 44   | 18-5               | CIN2                 | CIN2                              | CIN   | N/A                | HPV±CIN           | 99.38           |
| 45   | 19-1               | CIN1                 | N                                 | N     | N/A                | Normal            | 91.20           |
| 46   | 20-1               | CIN3                 | CIN1                              | CIN   | N/A                | HPV±CIN           | 99.32           |
| 47   | 20-2               | CIN3                 | CIN1                              | CIN   | N/A                | HPV±CIN           | 99.38           |
| 48   | 20-3               | CIN3                 | CIN1/2                            | CIN   | N/A                | HPV±CIN           | 98.78           |
| 49   | 21-1               | CIN2                 | CIN2/3                            | CIN   | N/A                | HPV±CIN           | 99.34           |
| 50   | 21-2               | CIN2                 | CIN2/3                            | CIN   | N/A                | HPV±CIN           | 99.31           |
| 51   | 22-1               | CIN3                 | HPV                               | CIN   | N/A                | HPV±CIN           | 99.37           |
| 52   | 22-2               | CIN3                 | HPV                               | CIN   | N/A                | HPV±CIN           | 99.34           |
| 53   | 22-3               | CIN3                 | HPV                               | CIN   | N/A                | HPV±CIN           | 99.34           |
| 54   | 23-1               | CIN2                 | CIN3                              | CIN   | N/A                | HPV±CIN           | 99.36           |
| 55   | 23-2               | CIN2                 | CIN3                              | CIN   | N/A                | HPV±CIN           | 99.38           |
| 56   | 24-1               | CIN2                 | HPV                               | CIN   | N/A                | HPV±CIN           | 99.35           |
| 57   | 24-2               | CIN2                 | HPV                               | CIN   | N/A                | HPV±CIN           | 99.36           |
| 58   | 25-1               | CIN2                 | HPV                               | CIN   | N/A                | HPV±CIN           | 99.36           |
| 59   | 25-2               | CIN2                 | HPV                               | CIN   | N/A                | HPV±CIN           | 99.33           |
| 60   | 25-3               | CIN2                 | HPV                               | CIN   | N/A                | HPV±CIN           | 99.29           |
| 61   | 25-4               | CIN2                 | HPV                               | CIN   | N/A                | HPV±CIN           | 99.31           |
| 62   | 26-1               | CIN1/2               | CIN2/3                            | CIN   | N/A                | HPV±CIN           | 99.39           |

| Burn | SAMPLE INFORMATION | SURGEON'S IMPRESSION | HISTOPATHOLOGISTS IMPRESSION      |       |                    | IKNIFE IMPRESSION |                 |
|------|--------------------|----------------------|-----------------------------------|-------|--------------------|-------------------|-----------------|
|      | Patient -Burn      | Class                | Histological diagnosis (comments) | Class | Tumour content (%) | Class             | Probability (%) |
| 63   | 26-2               | CIN1/2               | CIN2/3                            | CIN   | N/A                | HPV±CIN           | 99.38           |
| 64   | 26-3               | CIN1/2               | CIN3                              | CIN   | N/A                | HPV±CIN           | 99.36           |
| 65   | 27-1               | CIN1                 | CIN1/2                            | CIN   | N/A                | HPV±CIN           | 99.32           |
| 66   | 27-2               | CIN1                 | CIN1/2                            | CIN   | N/A                | HPV±CIN           | 99.37           |
| 67   | 27-3               | CIN1                 | CIN1/2                            | CIN   | N/A                | HPV±CIN           | 99.37           |
| 68   | 28-1               | CIN2/3               | CIN2/3                            | CIN   | N/A                | HPV±CIN           | 99.36           |
| 69   | 28-2               | CIN2/3               | CIN2/3                            | CIN   | N/A                | HPV±CIN           | 99.31           |
| 70   | 28-3               | CIN2/3               | CIN2/3                            | CIN   | N/A                | HPV±CIN           | 99.25           |
| 71   | 28-4               | CIN2/3               | CIN2/3                            | CIN   | N/A                | HPV±CIN           | 99.35           |
| 72   | 28-5               | CIN2/3               | CIN2/3                            | CIN   | N/A                | HPV±CIN           | 99.37           |
| 73   | 28-6               | CIN2/3               | CIN2/3                            | CIN   | N/A                | HPV±CIN           | 99.36           |
| 74   | 28-7               | CIN2/3               | CIN2/3                            | CIN   | N/A                | HPV±CIN           | 99.39           |
| 75   | 29-1               | CIN1                 | N                                 | N     | N/A                | Normal            | 92.19           |
| 76   | 30-1               | CIN1                 | CIN2                              | CIN   | N/A                | HPV±CIN           | 99.35           |
| 77   | 30-2               | CIN1                 | CIN2/3                            | CIN   | N/A                | HPV±CIN           | 99.31           |
| 78   | 30-3               | CIN1                 | CIN2/3                            | CIN   | N/A                | HPV±CIN           | 99.35           |
| 79   | 31-1               | CIN2                 | HPV                               | CIN   | N/A                | HPV±CIN           | 99.35           |
| 80   | 32-1               | X                    | N                                 | N     | N/A                | Normal            | 88.52           |
| 81   | 33-1               | CIN3                 | HPV                               | CIN   | N/A                | HPV±CIN           | 99.33           |
| 82   | 33-2               | CIN3                 | HPV                               | CIN   | N/A                | HPV±CIN           | 99.37           |
| 83   | 34-1               | CIN3                 | CIN3                              | CIN   | N/A                | HPV±CIN           | 99.36           |
| 84   | 34-2               | CIN3                 | CIN3                              | CIN   | N/A                | HPV±CIN           | 99.38           |
| 85   | 34-3               | CIN3                 | CIN3                              | CIN   | N/A                | HPV±CIN           | 99.35           |
| 86   | 35-1               | CIN2                 | HPV                               | CIN   | N/A                | HPV±CIN           | 99.38           |
| 87   | 35-2               | CIN2                 | HPV                               | CIN   | N/A                | HPV±CIN           | 99.37           |
| 88   | 36-1               | CIN3                 | HPV                               | CIN   | N/A                | HPV±CIN           | 99.39           |
| 89   | 36-2               | CIN3                 | HPV                               | CIN   | N/A                | HPV±CIN           | 99.37           |
| 90   | 36-3               | CIN3                 | HPV                               | CIN   | N/A                | HPV±CIN           | 99.38           |
| 91   | 37-1               | CIN1                 | N                                 | N     | N/A                | Normal            | 97.61           |
| 92   | 37-2               | CIN1                 | N                                 | N     | N/A                | Normal            | 92.03           |
| 93   | 38-1               | CIN1                 | HPV                               | CIN   | N/A                | HPV±CIN           | 99.39           |
| 94   | 39-1               | CIN1                 | HPV                               | CIN   | N/A                | HPV±CIN           | 99.38           |
| 95   | 39-2               | CIN1                 | HPV                               | CIN   | N/A                | HPV±CIN           | 99.38           |
| 96   | 40-1               | CIN2                 | HPV                               | CIN   | N/A                | HPV±CIN           | 99.38           |
| 97   | 40-2               | CIN2                 | HPV                               | CIN   | N/A                | HPV±CIN           | 99.37           |
| 98   | 40-3               | CIN2                 | HPV                               | CIN   | N/A                | HPV±CIN           | 99.38           |
| 99   | 41-1               | CIN3                 | CIN2/3                            | CIN   | N/A                | HPV±CIN           | 99.35           |
| 100  | 41-1               | CIN3                 | CIN2/3                            | CIN   | N/A                | HPV±CIN           | 99.37           |
| 101  | 42-1               | CIN1                 | HPV                               | CIN   | N/A                | HPV±CIN           | 99.35           |
| 102  | 42-2               | CIN1                 | CIN1/2                            | CIN   | N/A                | HPV±CIN           | 99.32           |
| 103  | 42-3               | CIN1                 | CIN1/2                            | CIN   | N/A                | HPV±CIN           | 99.36           |
| 104  | 43-1               | CIN3                 | HPV                               | CIN   | N/A                | HPV±CIN           | 99.30           |
| 105  | 43-2               | CIN3                 | HPV                               | CIN   | N/A                | HPV±CIN           | 99.37           |
| 106  | 44-1               | N                    | N                                 | N     | N/A                | Normal            | 99.36           |
| 107  | 44-2               | N                    | N                                 | N     | N/A                | Normal            | 88.51           |
| 108  | 45-1               | CIN1/2               | CIN3                              | CIN   | N/A                | HPV±CIN           | 99.35           |
| 109  | 45-2               | CIN1/2               | CIN3                              | CIN   | N/A                | HPV±CIN           | 99.35           |
| 110  | 46-1               | CIN1                 | N                                 | N     | N/A                | Normal            | 98.87           |
| 111  | 47-1               | CIN3                 | HPV                               | CIN   | N/A                | HPV±CIN           | 99.37           |
| 112  | 47-2               | CIN3                 | HPV                               | CIN   | N/A                | HPV±CIN           | 99.28           |
| 113  | 48-1               | N                    | N                                 | N     | N/A                | Normal            | 97.93           |
| 114  | 49-1               | CIN2                 | CIN2/3                            | CIN   | N/A                | HPV±CIN           | 99.35           |
| 115  | 49-2               | CIN2                 | CIN2/3                            | CIN   | N/A                | HPV±CIN           | 99.35           |
| 116  | 49-3               | CIN2                 | CIN2/3                            | CIN   | N/A                | HPV±CIN           | 99.38           |
| 117  | 50-1               | CIN2                 | HPV                               | CIN   | N/A                | HPV±CIN           | 99.35           |
| 118  | 51-1               | CIN2                 | HPV                               | CIN   | N/A                | HPV±CIN           | 99.38           |
| 119  | 51-2               | CIN2                 | HPV                               | CIN   | N/A                | HPV±CIN           | 99.37           |
| 120  | 52-1               | CIN3                 | CIN3                              | CIN   | N/A                | HPV±CIN           | 99.39           |
| 121  | 53-1               | CIN2                 | CIN3                              | CIN   | N/A                | HPV±CIN           | 99.38           |
| 122  | 53-2               | CIN2                 | CIN3                              | CIN   | N/A                | HPV±CIN           | 99.38           |
| 123  | 54-1               | CIN2                 | CIN3                              | CIN   | N/A                | HPV±CIN           | 99.28           |
| 124  | 54-2               | CIN2                 | CIN3                              | CIN   | N/A                | HPV±CIN           | 99.36           |
| 125  | 55-1               | CIN2                 | HPV                               | CIN   | N/A                | HPV±CIN           | 99.35           |
| 126  | 55-2               | CIN2                 | HPV                               | CIN   | N/A                | HPV±CIN           | 99.35           |
| 127  | 56-1               | CIN2                 | CIN3                              | CIN   | N/A                | HPV±CIN           | 99.37           |
| 128  | 56-2               | CIN2                 | CIN3                              | CIN   | N/A                | HPV±CIN           | 99.37           |
| 129  | 57-1               | CIN2                 | CIN2/3                            | CIN   | N/A                | HPV±CIN           | 99.37           |
| 130  | 57-2               | CIN2                 | CIN2/3                            | CIN   | N/A                | HPV±CIN           | 99.37           |
| 131  | 57-3               | CIN2                 | CIN2/3                            | CIN   | N/A                | HPV±CIN           | 99.37           |
| 132  | 58-1               | N                    | N                                 | N     | N/A                | Normal            | 79.48           |
| 133  | 59-1               | CIN3                 | CIN3                              | CIN   | N/A                | HPV±CIN           | 99.38           |

| Burn | SAMPLE INFORMATION | SURGEON'S IMPRESSION | HISTOPATHOLOGISTS IMPRESSION      |       |                    | IKNIFE IMPRESSION |                 |
|------|--------------------|----------------------|-----------------------------------|-------|--------------------|-------------------|-----------------|
|      | Patient -Burn      | Class                | Histological diagnosis (comments) | Class | Tumour content (%) | Class             | Probability (%) |
| 134  | 59-2               | CIN3                 | CIN3                              | CIN   | N/A                | HPV±CIN           | 99.29           |
| 135  | 60-1               | CIN2                 | CIN2                              | CIN   | N/A                | HPV±CIN           | 99.38           |
| 136  | 60-2               | CIN2                 | HPV                               | CIN   | N/A                | HPV±CIN           | 99.37           |
| 137  | 61-1               | HPV                  | N                                 | N     | N/A                | Normal            | 98.74           |
| 138  | 62-1               | CIN2                 | HPV                               | CIN   | N/A                | HPV±CIN           | 99.30           |
| 139  | 62-2               | CIN2                 | HPV                               | CIN   | N/A                | HPV±CIN           | 99.37           |
| 140  | 62-3               | CIN2                 | HPV                               | CIN   | N/A                | HPV±CIN           | 99.35           |
| 141  | 63-1               | N                    | HPV                               | CIN   | N/A                | HPV±CIN           | 99.22           |
| 142  | 63-2               | N                    | HPV                               | CIN   | N/A                | HPV±CIN           | 99.31           |
| 143  | 64-1               | CIN1/2               | CIN1                              | CIN   | N/A                | HPV±CIN           | 99.37           |
| 144  | 64-2               | CIN1/2               | CIN1                              | CIN   | N/A                | HPV±CIN           | 99.35           |
| 145  | 65-1               | CIN1                 | N                                 | N     | N/A                | Normal            | 78.39           |
| 146  | 65-2               | CIN1                 | HPV                               | CIN   | N/A                | HPV±CIN           | 99.17           |
| 147  | 65-3               | CIN1                 | HPV                               | CIN   | N/A                | HPV±CIN           | 99.26           |
| 148  | 66-1               | CIN1                 | HPV                               | CIN   | N/A                | HPV±CIN           | 92.38           |
| 149  | 67-1               | CIN1/2               | CIN1/2                            | CIN   | N/A                | HPV±CIN           | 99.36           |
| 150  | 67-2               | CIN1/2               | CIN1/2                            | CIN   | N/A                | HPV±CIN           | 99.36           |
| 151  | 67-3               | CIN1/2               | CIN2/3                            | CIN   | N/A                | HPV±CIN           | 99.34           |
| 152  | 67-4               | CIN1/2               | CIN2/3                            | CIN   | N/A                | HPV±CIN           | 99.36           |
| 153  | 68-1               | N                    | HPV                               | CIN   | N/A                | HPV±CIN           | 99.21           |
| 154  | 68-2               | N                    | HPV                               | CIN   | N/A                | HPV±CIN           | 99.12           |
| 155  | 68-3               | N                    | HPV                               | CIN   | N/A                | HPV±CIN           | 98.88           |
| 156  | 69-1               | CIN1                 | CIN3                              | CIN   | N/A                | HPV±CIN           | 99.38           |
| 157  | 69-2               | CIN1                 | CIN3                              | CIN   | N/A                | HPV±CIN           | 99.38           |
| 158  | 69-3               | CIN1                 | CIN2/3                            | CIN   | N/A                | HPV±CIN           | 99.37           |
| 159  | 70-1               | N                    | N                                 | N     | N/A                | Normal            | 98.36           |
| 160  | 70-2               | N                    | N                                 | N     | N/A                | Normal            | 98.12           |
| 161  | 71-1               | N                    | HPV                               | CIN   | N/A                | HPV±CIN           | 99.37           |
| 162  | 71-2               | N                    | CIN1/2                            | CIN   | N/A                | HPV±CIN           | 99.36           |
| 163  | 71-3               | N                    | CIN1/2                            | CIN   | N/A                | HPV±CIN           | 99.19           |
| 164  | 72-1               | CIN2                 | N                                 | N     | N/A                | Normal            | 99.24           |
| 165  | 73-1               | Ca                   | SCC                               | Ca    | 90                 | Cancer            | 99.33           |
| 166  | 73-2               | Ca                   | SCC                               | Ca    | 90                 | Cancer            | 98.78           |
| 167  | 73-3               | Ca                   | SCC                               | Ca    | 90                 | Cancer            | 99.12           |
| 168  | 73-4               | Ca                   | SCC                               | Ca    | 90                 | Cancer            | 97.01           |
| 169  | 73-5               | Ca                   | SCC                               | Ca    | 90                 | Cancer            | 99.87           |
| 170  | 74-1               | Ca                   | SCC                               | Ca    | 90                 | Cancer            | 98.22           |
| 171  | 74-2               | Ca                   | SCC                               | Ca    | 90                 | Cancer            | 99.01           |
| 172  | 74-3               | Ca                   | SCC                               | Ca    | 90                 | Cancer            | 98.14           |
| 173  | 75-1               | Ca                   | SCC                               | Ca    | 50                 | Cancer            | 88.74           |
| 174  | 75-2               | Ca                   | SCC                               | Ca    | 50                 | Cancer            | 89.03           |
| 175  | 75-3               | Ca                   | SCC                               | Ca    | 50                 | Cancer            | 91.11           |
| 176  | 76-1               | Ca                   | SCC                               | Ca    | 60                 | Cancer            | 92.44           |
| 177  | 76-2               | Ca                   | SCC                               | Ca    | 60                 | Cancer            | 90.12           |
| 178  | 76-3               | Ca                   | SCC                               | Ca    | 60                 | Cancer            | 87.79           |
| 179  | 76-4               | Ca                   | SCC                               | Ca    | 60                 | Cancer            | 90.59           |
| 180  | 77-1               | Ca                   | SCC                               | Ca    | 80                 | Cancer            | 80.67           |
| 181  | 77-2               | Ca                   | SCC                               | Ca    | 80                 | Cancer            | 98.58           |
| 182  | 77-3               | Ca                   | SCC                               | Ca    | 80                 | Cancer            | 95.31           |
| 183  | 77-4               | Ca                   | SCC                               | Ca    | 80                 | Cancer            | 99.23           |
| 184  | 77-5               | Ca                   | SCC                               | Ca    | 80                 | Cancer            | 97.81           |
| 185  | 77-6               | Ca                   | SCC                               | Ca    | 80                 | Cancer            | 99.09           |
| 186  | 78-1               | Ca                   | SCC                               | Ca    | 50                 | Cancer            | 79.98           |
| 187  | 79-1               | Ca                   | SCC                               | Ca    | 80                 | Cancer            | 96.37           |
| 188  | 80-1               | Ca                   | AdenoCa                           | Ca    | 50                 | Cancer            | 88.98           |
| 189  | 81-1               | Ca                   | SCC                               | Ca    | 90                 | Cancer            | 94.46           |
| 190  | 81-2               | Ca                   | SCC                               | Ca    | 90                 | Cancer            | 92.39           |
| 191  | 81-3               | Ca                   | SCC                               | Ca    | 90                 | Cancer            | 93.09           |
| 192  | 81-4               | Ca                   | SCC                               | Ca    | 90                 | Cancer            | 97.82           |
| 193  | 81-5               | Ca                   | SCC                               | Ca    | 90                 | Cancer            | 99.27           |
| 194  | 82-1               | Ca                   | SCC (CIN2-3 in sample)            | Ca    | 50                 | Cancer            | 91.24           |
| 195  | 82-2               | Ca                   | SCC (CIN2-3 in sample)            | Ca    | 50                 | Cancer            | 94.06           |
| 196  | 82-3               | Ca                   | SCC (CIN2-3 in sample)            | Ca    | 50                 | Cancer            | 90.72           |
| 197  | 82-4               | Ca                   | SCC (CIN2-3 in sample)            | Ca    | 50                 | Cancer            | 93.92           |
| 198  | 83-1               | Ca                   | SCC                               | Ca    | 95                 | Cancer            | 95.17           |
| 199  | 83-2               | Ca                   | SCC                               | Ca    | 95                 | Cancer            | 98.20           |
| 200  | 83-3               | Ca                   | SCC                               | Ca    | 95                 | Cancer            | 97.89           |
| 201  | 84-1               | Ca                   | SCC                               | Ca    | 50                 | Cancer            | 88.47           |
| 202  | 84-2               | Ca                   | SCC                               | Ca    | 50                 | Cancer            | 92.38           |
| 203  | 84-3               | Ca                   | SCC                               | Ca    | 50                 | Cancer            | 94.12           |
| 204  | 85-1               | Ca                   | SCC (HPV in sample)               | Ca    | 50                 | Cancer            | 95.35           |

| Burn | SAMPLE INFORMATION |                               | HISTOPATHOLOGISTS IMPRESSION      |       |                    | IKNIFE IMPRESSION |                 |
|------|--------------------|-------------------------------|-----------------------------------|-------|--------------------|-------------------|-----------------|
|      | Patient -Burn      | SURGEON'S IMPRESSION<br>Class | Histological diagnosis (comments) | Class | Tumour content (%) | Class             | Probability (%) |
| 205  | 85-2               | Ca                            | SCC (HPV in sample)               | Ca    | 50                 | Cancer            | 97.27           |
| 206  | 85-3               | Ca                            | SCC (HPV in sample)               | Ca    | 50                 | Cancer            | 91.23           |
| 207  | 86-1               | Ca                            | SCC                               | Ca    | 70                 | Cancer            | 96.41           |
| 208  | 86-2               | Ca                            | SCC                               | Ca    | 70                 | Cancer            | 93.49           |
| 209  | 87-1               | Ca                            | SCC (CIN2-3 in sample)            | Ca    | 50                 | Cancer            | 92.52           |

CIN: Cervical Intraepithelial Neoplasia, HPV: Human Papilloma Virus, SCC: Squamous Cell Carcinoma, AdenoCa: Adeno Carcinoma.

\*Burn ID explanation: Sample (patient)\_No of burn on sample.

**Table S2.** Fresh frozen tissue samples classified using frozen cut model as reference dataset (cut mode). Correct report analysis is based on number of burns. Diagnostic accuracy (%) is based on number of samples.

| <b>Tissue Class</b> | <b>No of Patients</b> | <b>No of Burns</b> | <b>&gt;75% probability</b> | <b>Correct report</b> | <b>Cross Validation (%)</b> |
|---------------------|-----------------------|--------------------|----------------------------|-----------------------|-----------------------------|
| <b>Normal</b>       | 16                    | 25                 | 25                         | 23                    | 92.0%                       |
| <b>HPV±CIN</b>      | 50                    | 123                | 123                        | 123                   | 100%                        |
| <b>Cancer</b>       | 21                    | 61                 | 61                         | 56                    | 91.8%                       |
| <b>TOTALS</b>       | 87                    | 209                | 209                        | 202                   | 96.7%                       |

CIN: cervical intraepithelial neoplasia; HPV: human papillomavirus.

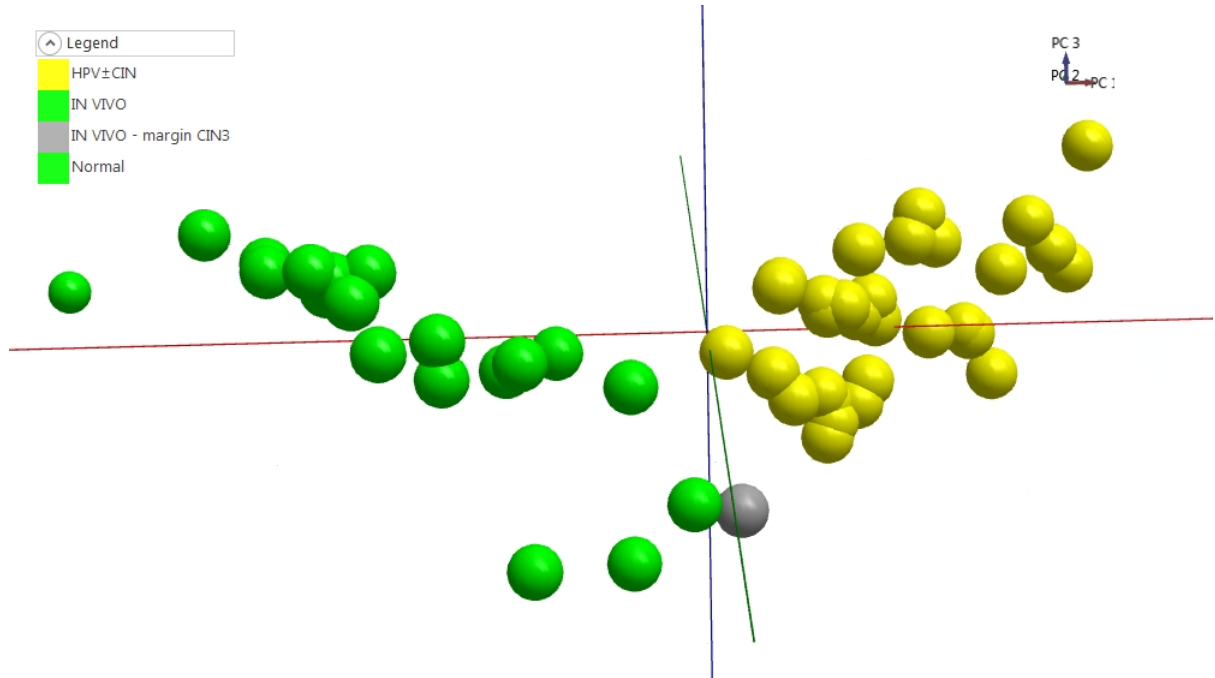

**Figure S1.** *In vivo* iKnife data of surgical margins from four patients modelled against *ex vivo* data from normal vs CIN tissue biopsies. The *in vivo* samples have been reclassified as normal samples, showing clear separation from the CIN samples alongside with the histopathology misclassified sample.
